# Supplementary material
Source: publisher site journal article supplement (https://www.dovepress.com/article/363200)
Supplement: Supplementary file 1 [file get_supplementary_file.php]

# NMF rank survey

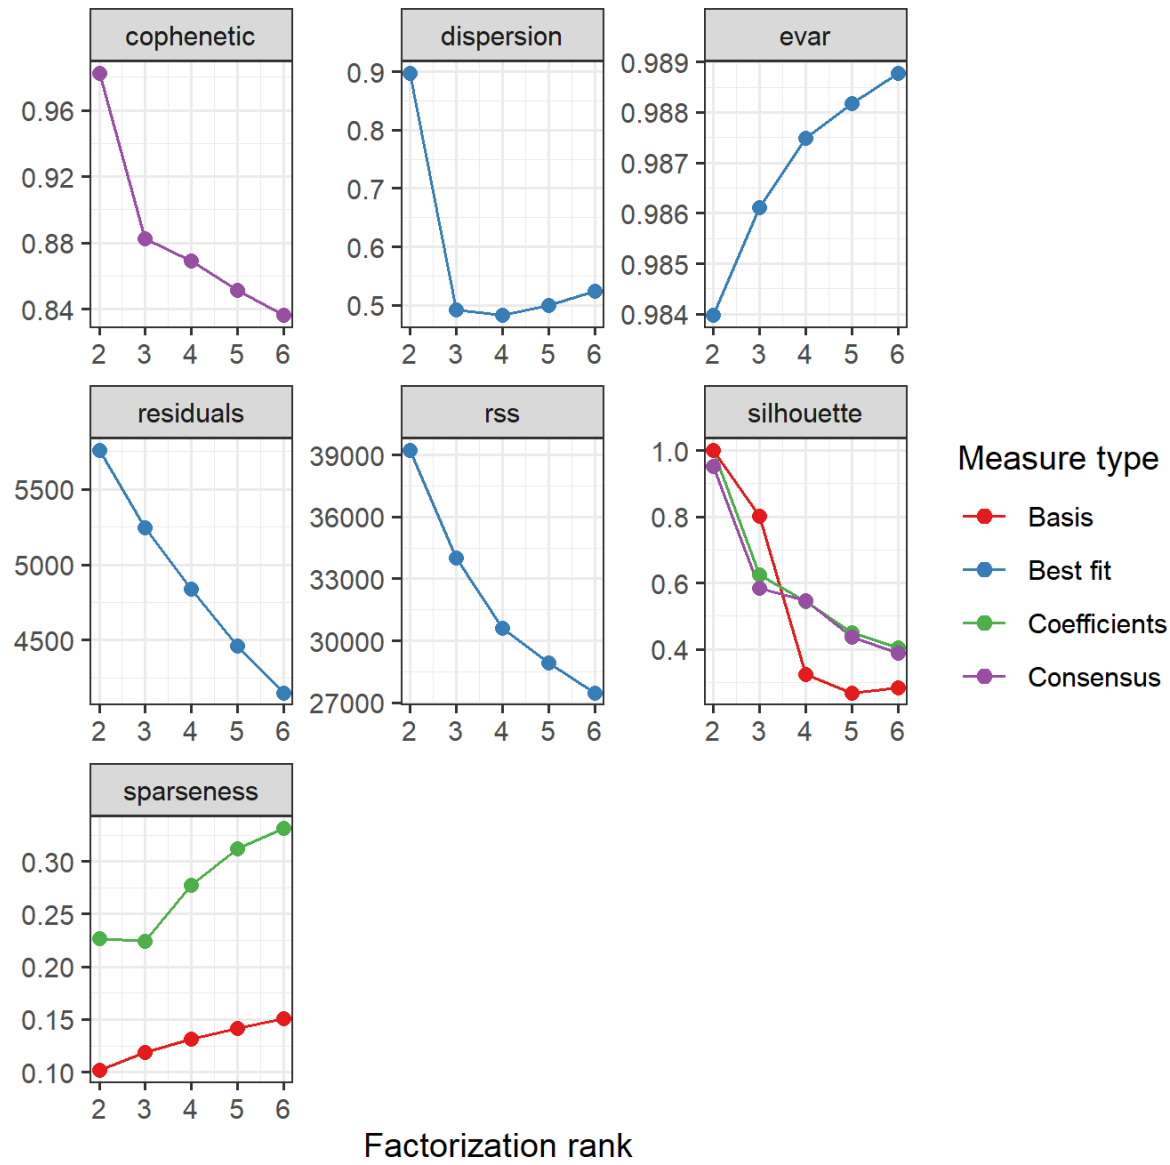

Figure S1 NMF rank survey.

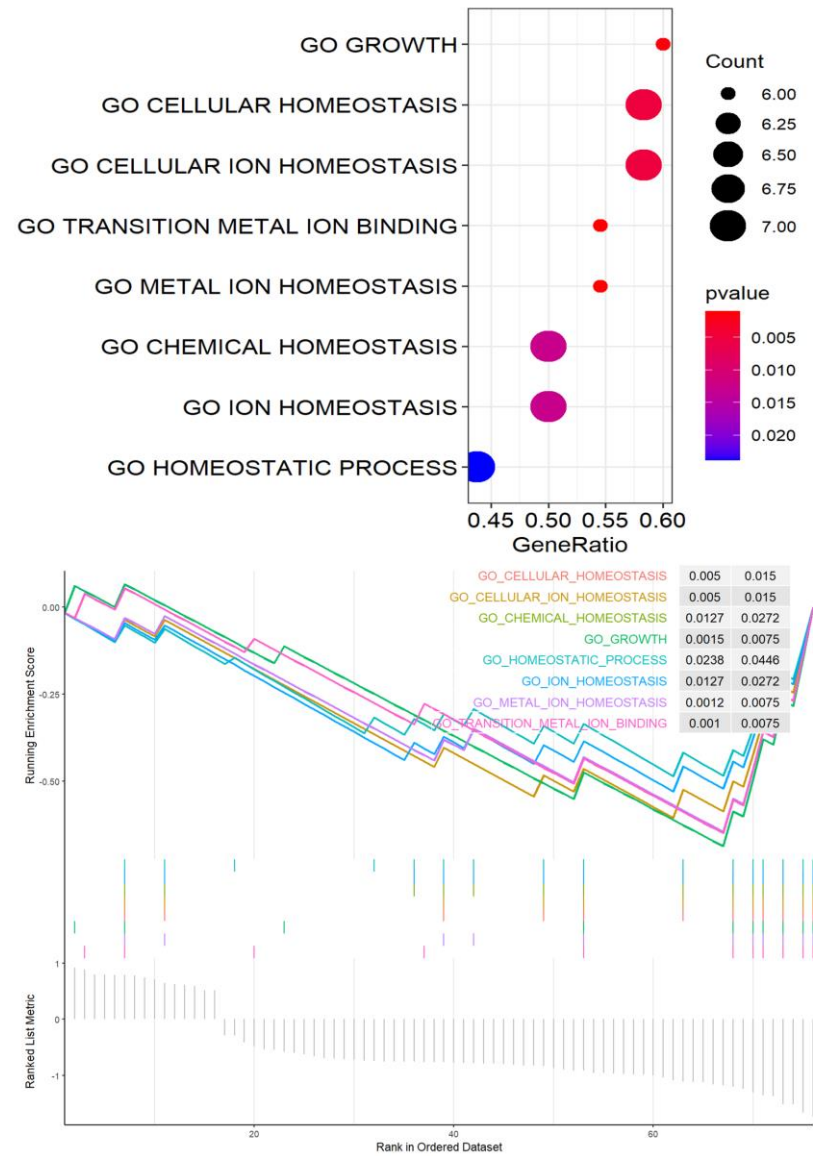

Figure S2 GO items with  $FDR < 0.05$  were identified based on gene set enrichment analysis (GSEA) performed between Cluster 1 and Cluster 2 subgroups.

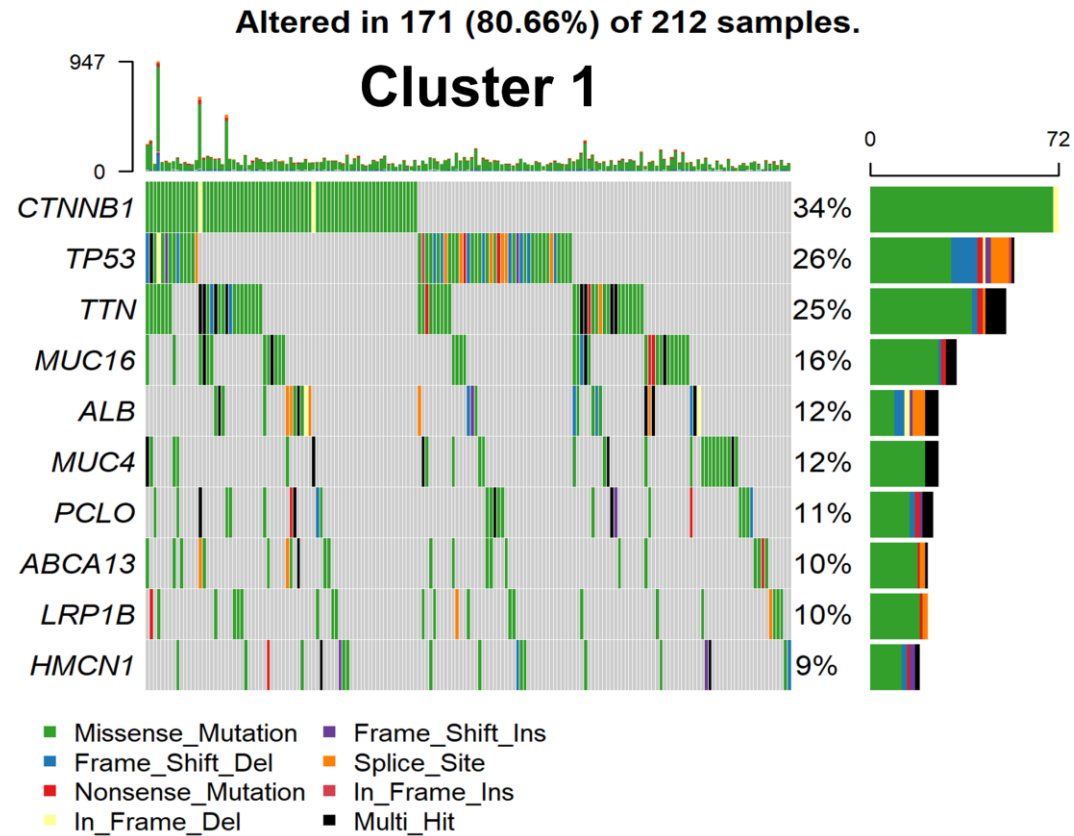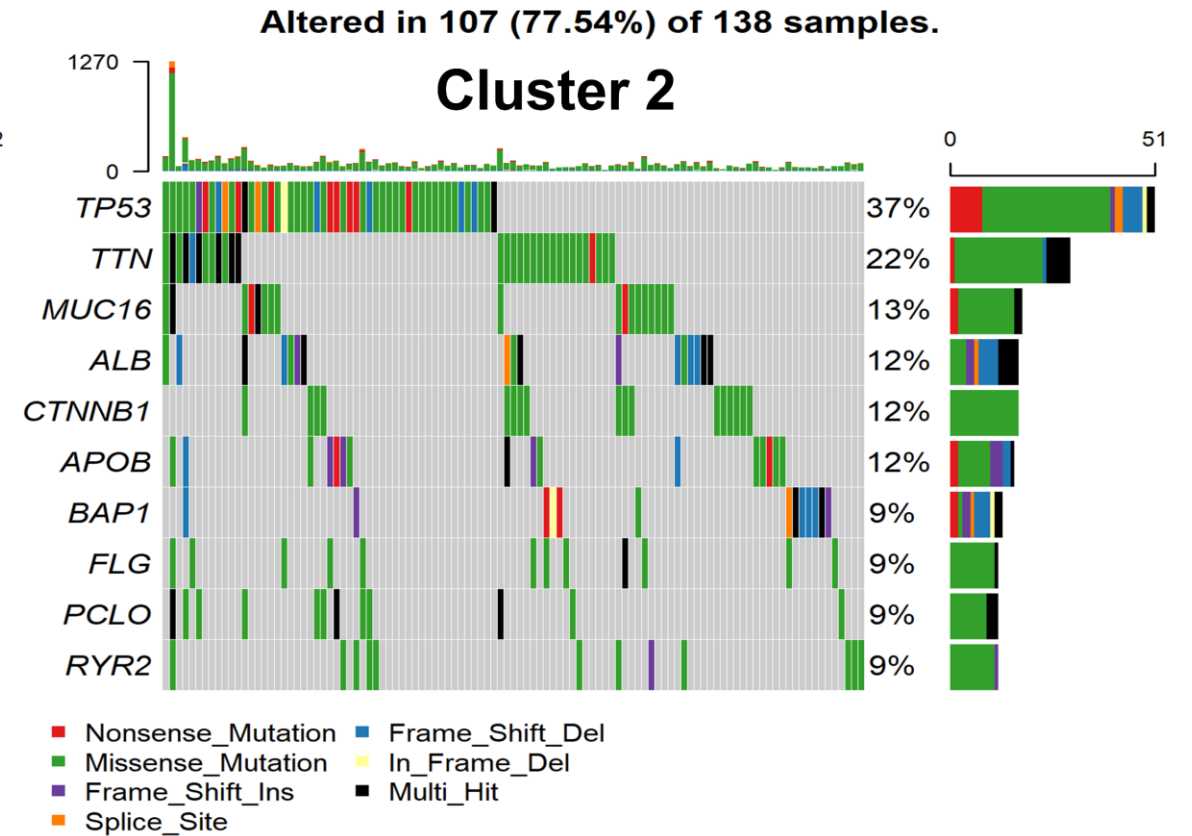

Figure S3 Tumor maps of mutated genes in Cluster 1 and Cluster 2 subgroups.

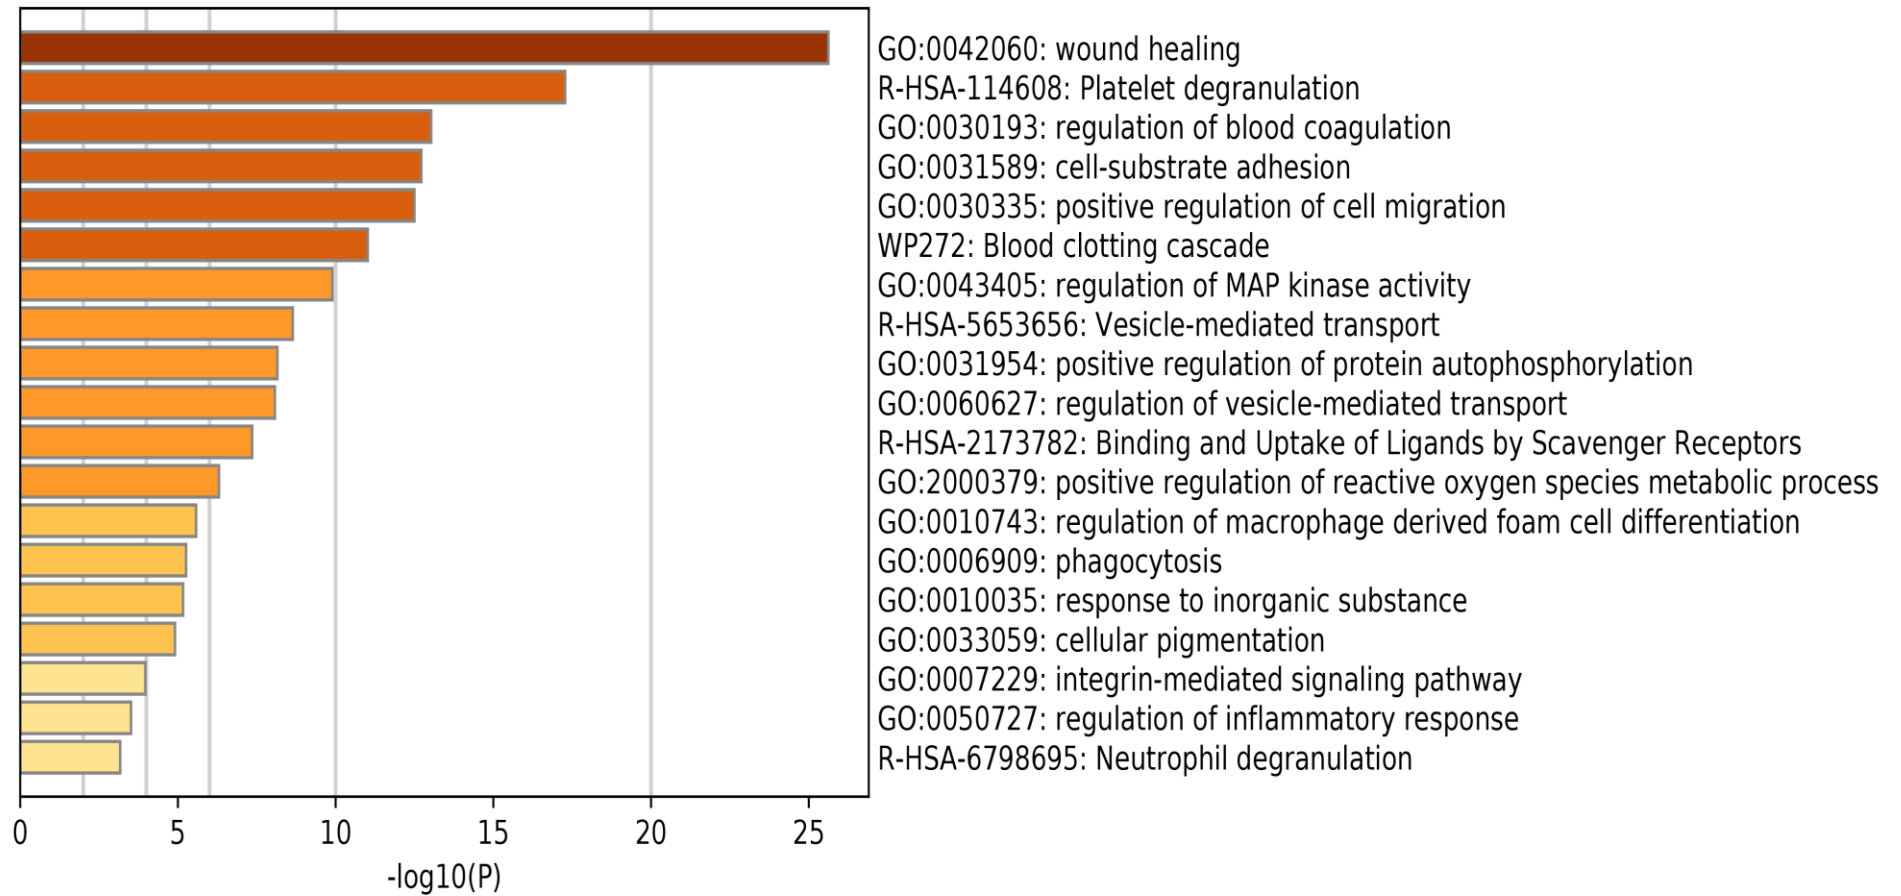

Figure S4 Enriched GO and KEGG items of overlapping genes.

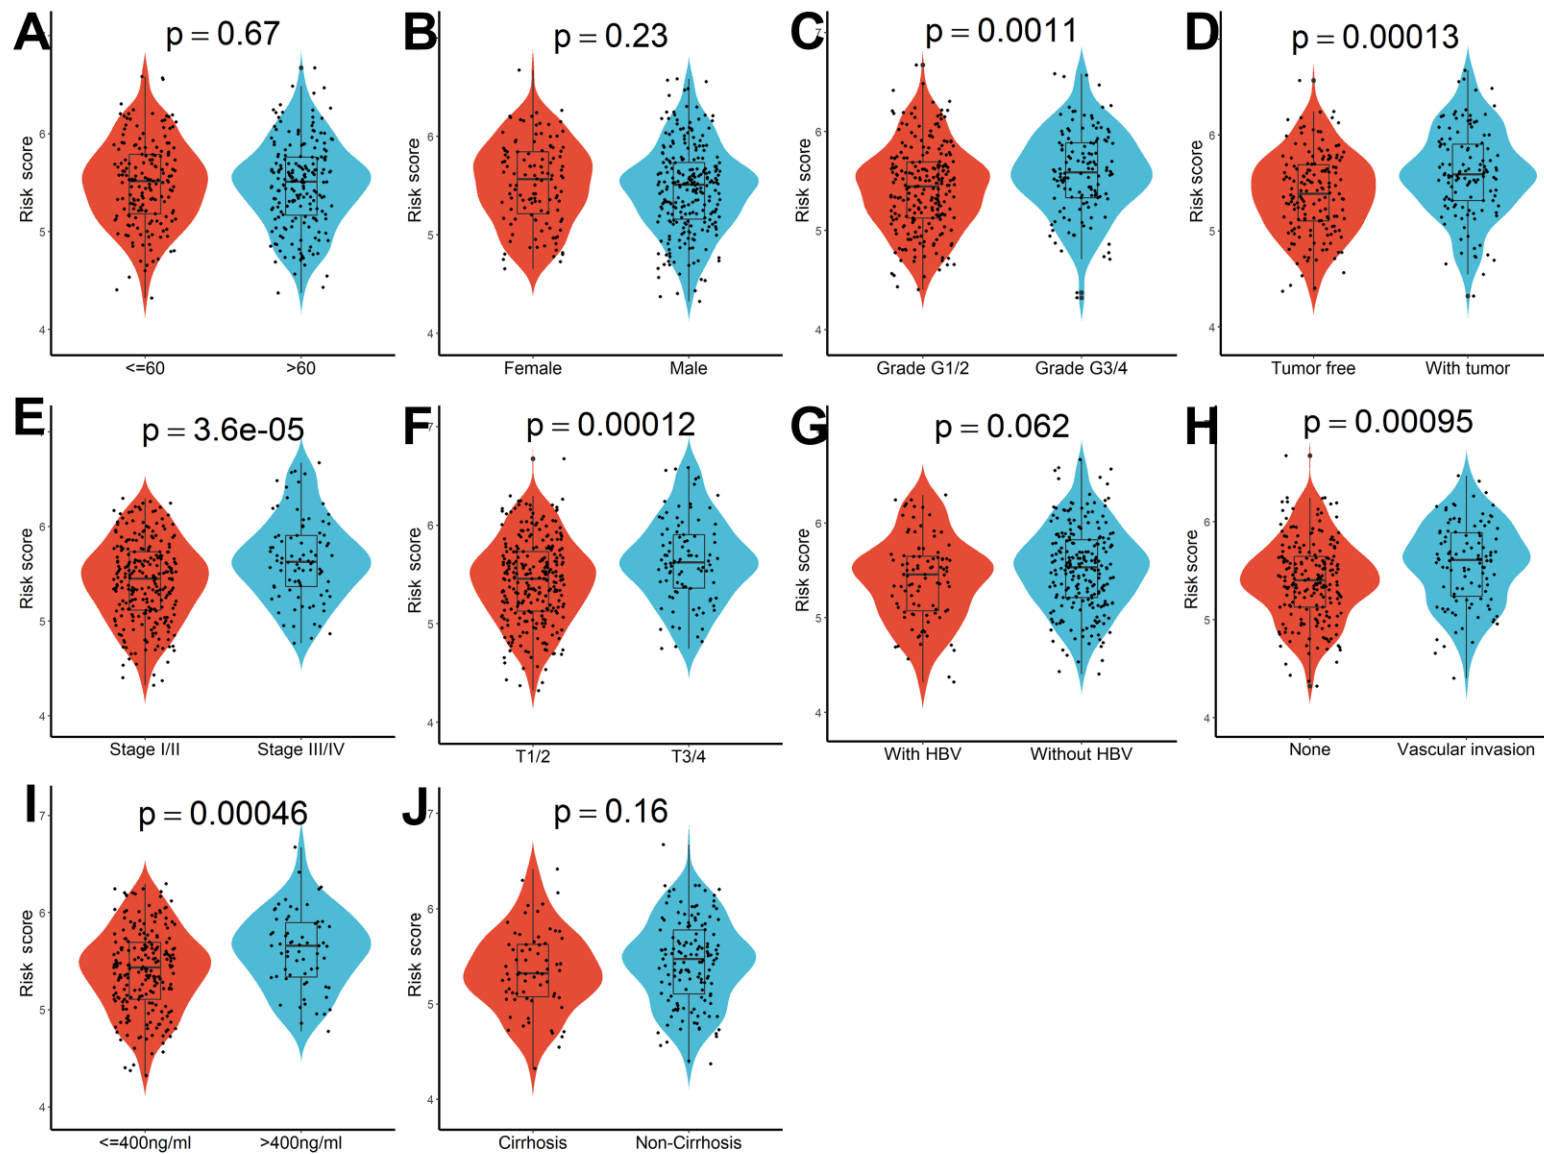

Figure S5 Clinical characteristics evaluation by this classifier. Violin plots showing that higher risk scores were linked to later grade, T stage, advanced TNM stage, recurrence, AFP value, and vascular invasion.

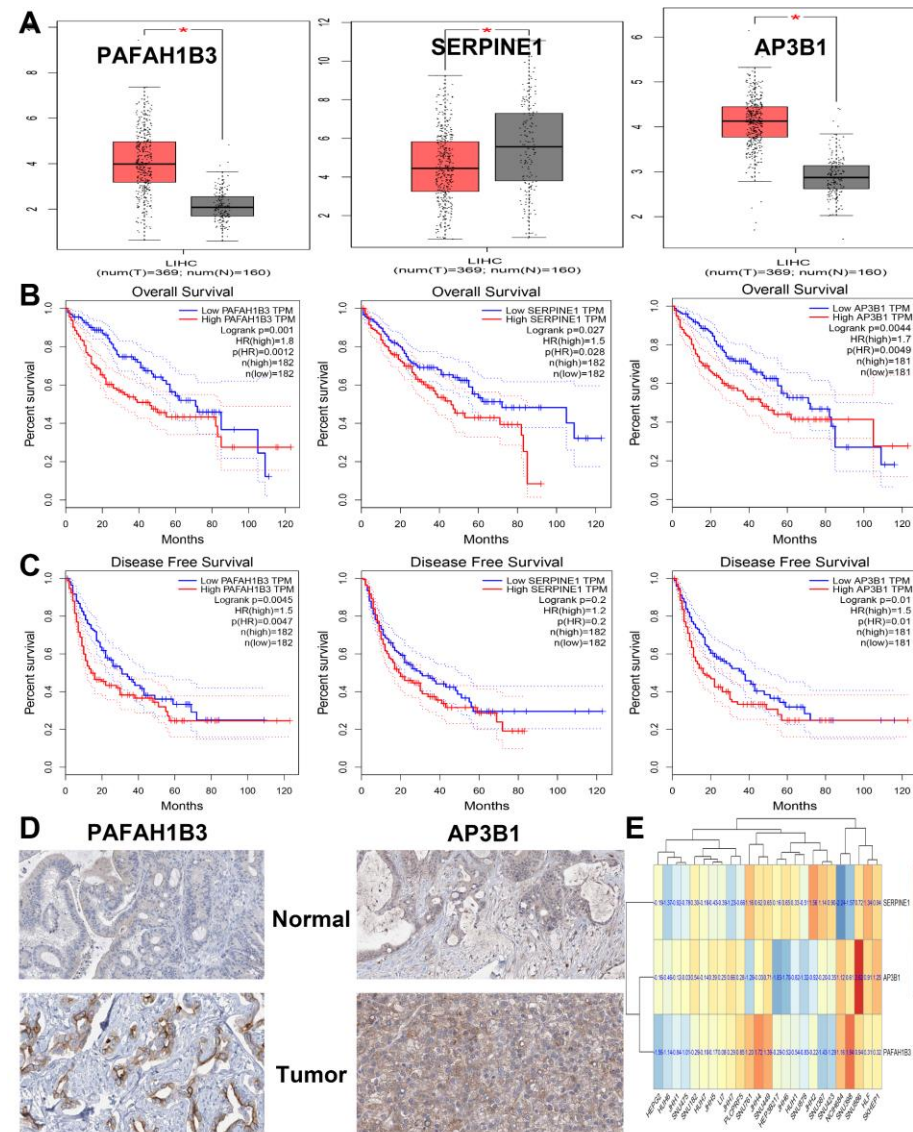

Figure S6 Expression levels of the three molecules explored in GEPIA, HPA, and CCLE database. (A) Expression levels of the three mRNA molecules in GEPIA. (B) Analysis of overall survival rate. (C) Analysis of disease-free survival rate. (D) Protein expression of PAFAH1B3 and AP3B1 in normal and HCC tissues. (E) Expression levels of the three mRNA molecules in CCLE. \*Stands for the P value less than 0.05.

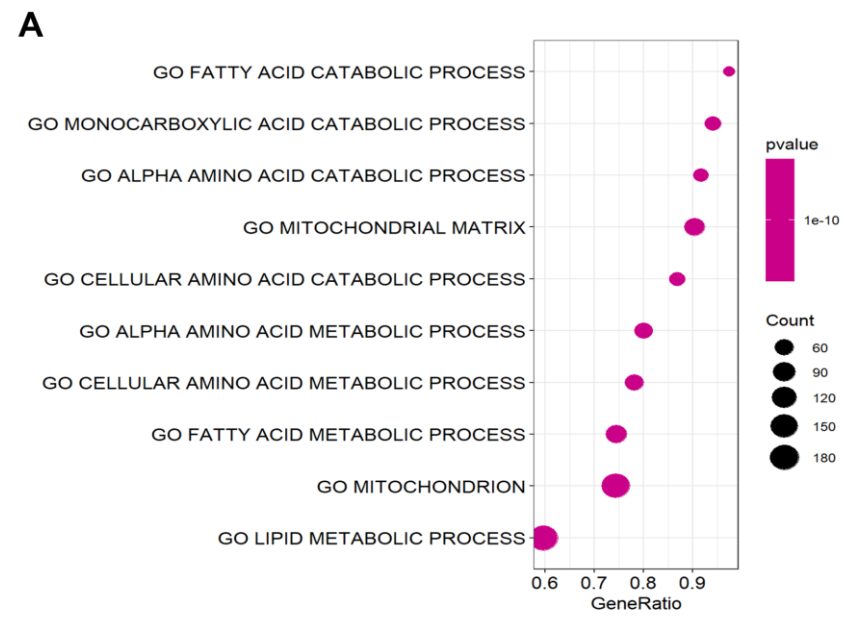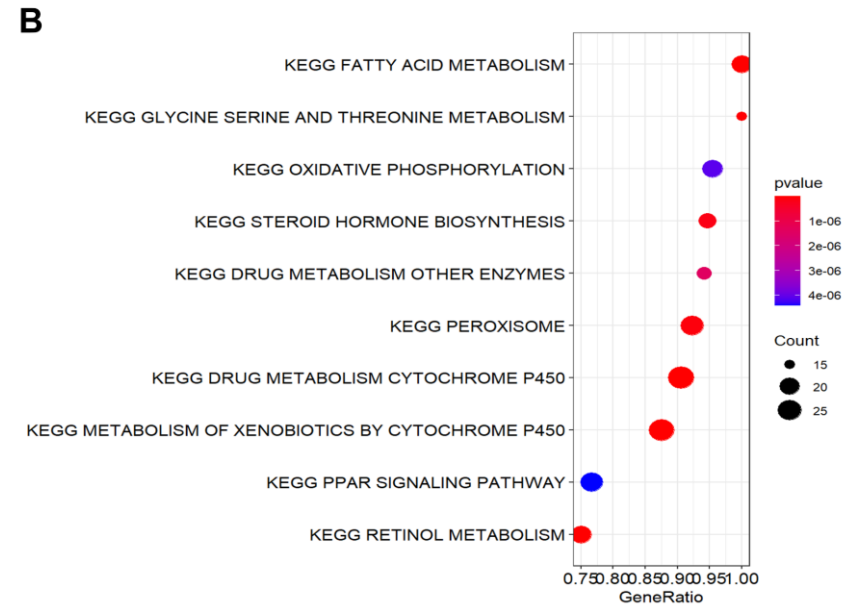

Figure S7 Identification of GO (A) and KEGG (B) items with FDR < 0.05 in the prognostic model.



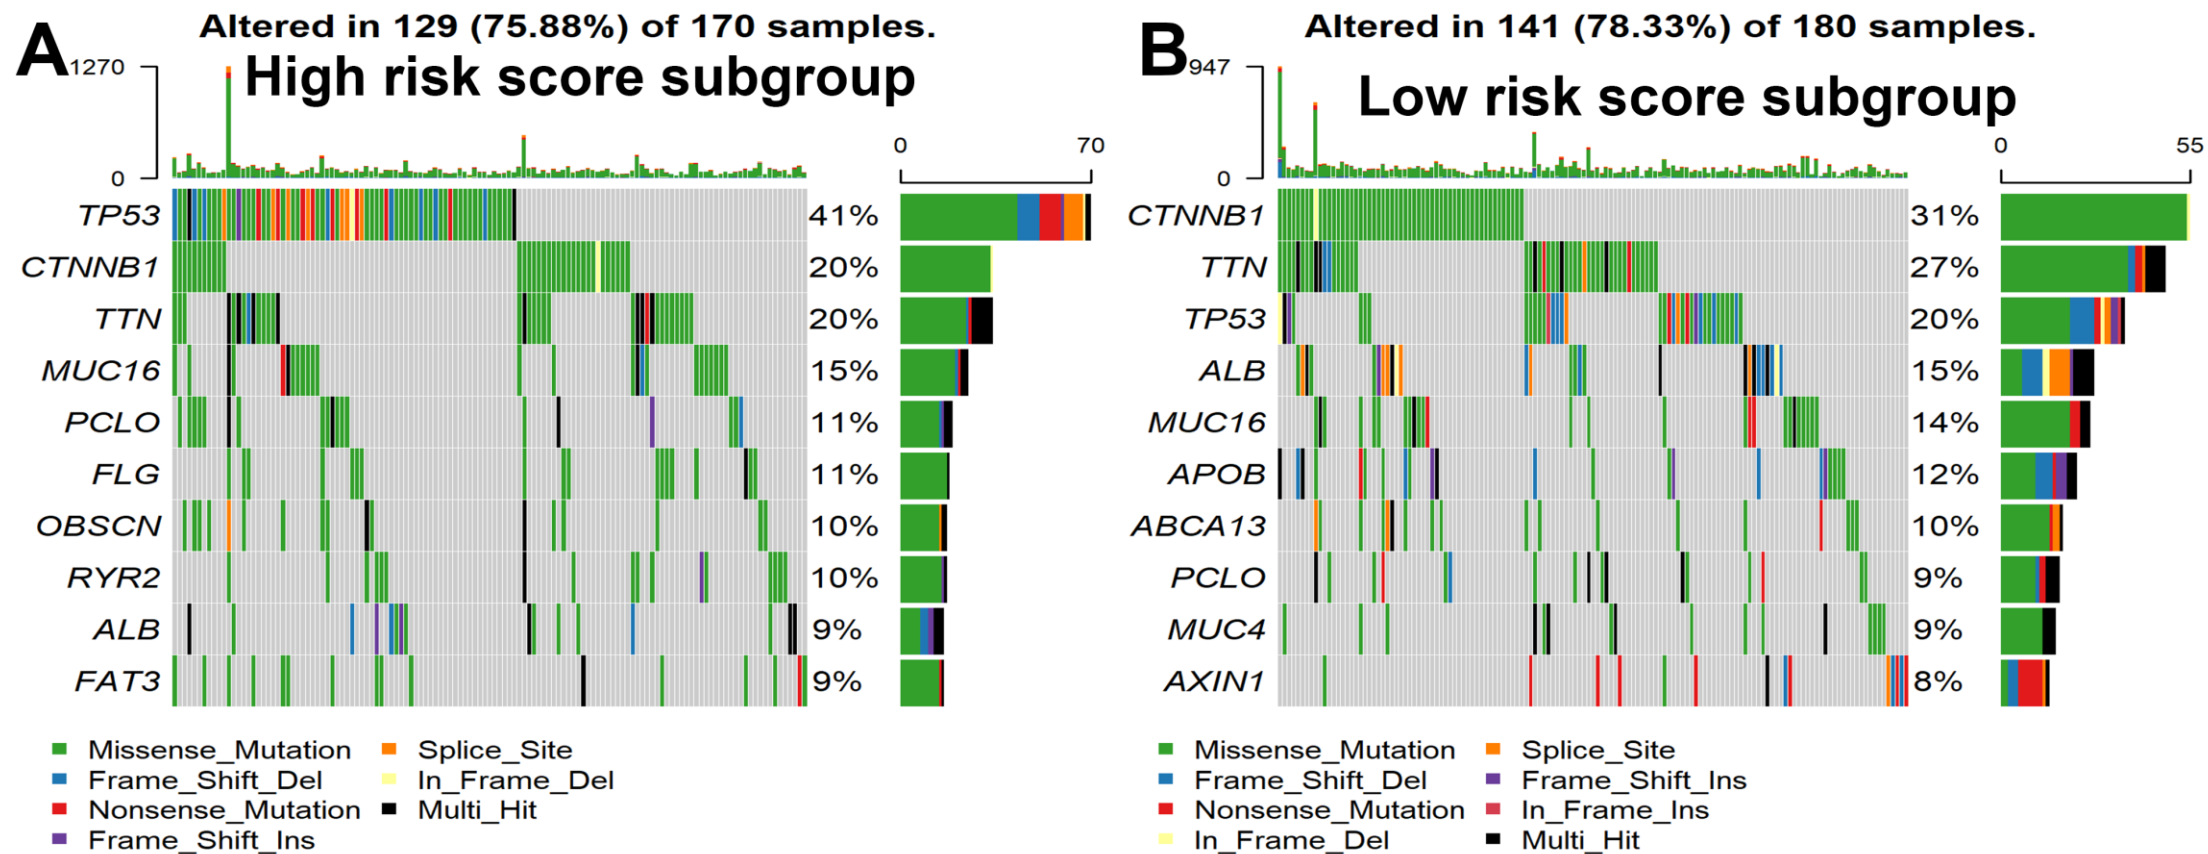

Figure S8 Tumor maps of mutated genes in high- (A) and low-risk (B) score subgroups.



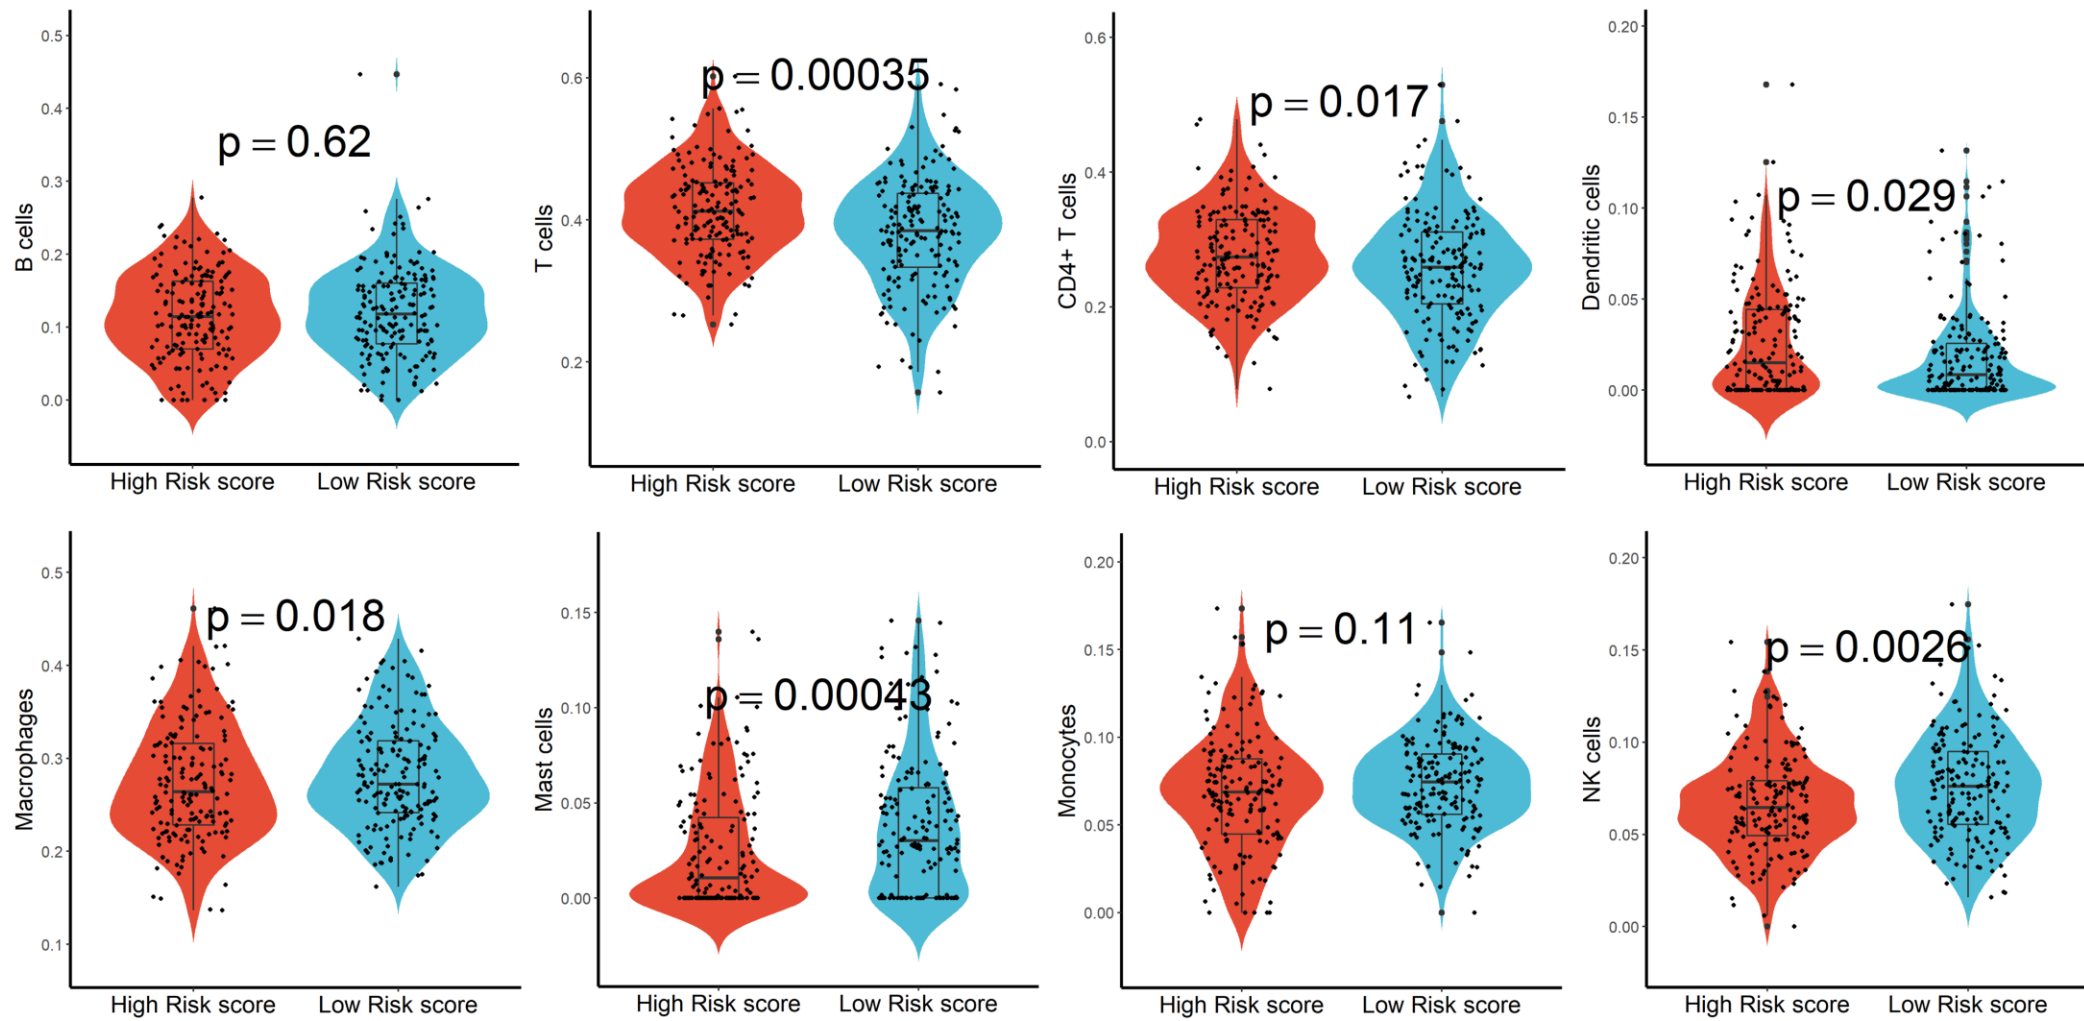

Figure S9 Abundance differentiation of TIICs in high- and low-risk score subgroups.

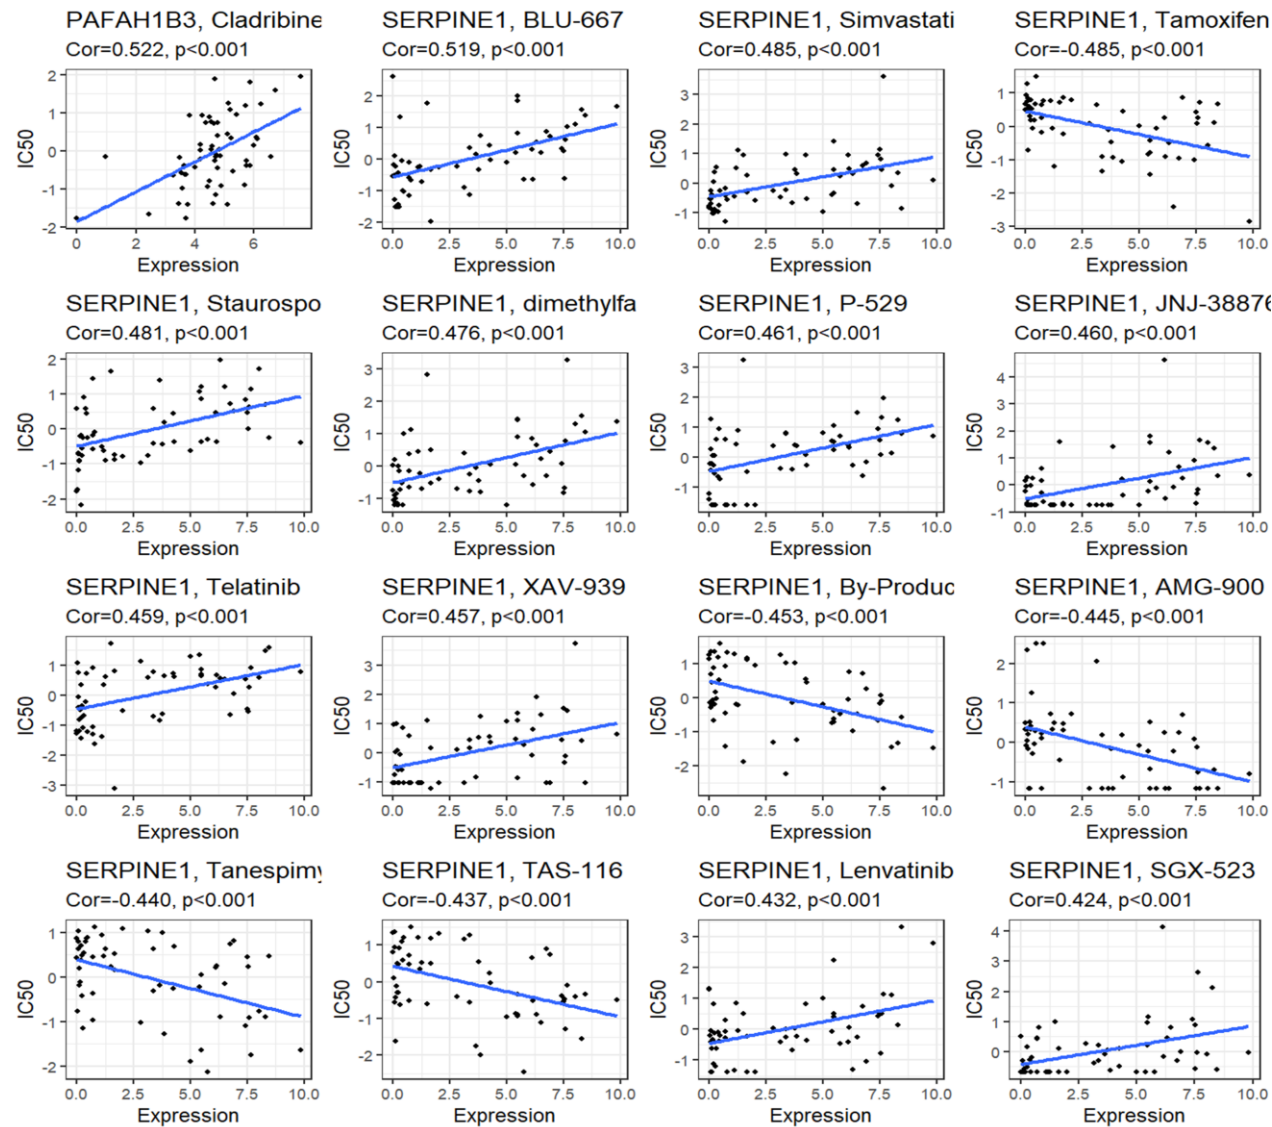

Figure S10 The top 16 most significant tumor-sensitive drugs obtained from correlation analysis of mRNA molecules in this classifier.

Table S1 Clinical characteristics of HCC patients involved in TCGA, ICGC, GSE14520, and the small size clinical cohort.

|                       | TCGA cohort<br>(N=365) | ICGC cohort<br>(N=227) | GSE14520 cohort<br>(N=216) | Independent<br>cohort<br>(N=59) |    |
|-----------------------|------------------------|------------------------|----------------------------|---------------------------------|----|
| Gender                | Male                   | 119                    | 61                         | 187                             | 45 |
|                       | Female                 | 246                    | 166                        | 29                              | 14 |
| Age                   | ≤60 years              | 173                    | 49                         | 178                             | 27 |
|                       | >60 years              | 192                    | 178                        | 38                              | 32 |
| Grade                 | G1/2                   | 230                    |                            |                                 | 35 |
|                       | G3/4                   | 130                    |                            |                                 | 24 |
|                       | unknown                | 5                      |                            |                                 |    |
| TNM Stage             | I/II                   | 254                    | 140                        | 167                             | 42 |
|                       | III/IV                 | 87                     | 87                         | 49                              | 17 |
|                       | unknown                | 24                     | 0                          | 0                               | 0  |
| Vascular Invasion     | Yes                    | 106                    |                            |                                 |    |
|                       | No                     | 205                    |                            |                                 |    |
|                       | unknown                | 5                      |                            |                                 |    |
| Recurrence With tumor |                        | 122                    |                            | 120                             | 29 |
|                       | Tumor free             | 161                    |                            | 96                              | 30 |
|                       | unknown                | 82                     |                            |                                 | 0  |
| Cirrhosis             | With                   | 68                     |                            | 198                             | 6  |
|                       | Without                | 141                    |                            | 18                              | 53 |
|                       | unknown                | 156                    |                            | 0                               | 0  |
| HBV or HCV Infection  |                        |                        |                            |                                 |    |
|                       | Yes                    | 149                    |                            | 209                             | 41 |
|                       | No                     | 203                    |                            | 6                               | 18 |
|                       | unknown                | 13                     |                            | 1                               | 0  |
| Child-Pugh            | A                      | 216                    |                            |                                 | 57 |
|                       | B                      | 21                     |                            |                                 | 2  |
|                       | C                      | 1                      |                            |                                 | 0  |
|                       | unknown                | 127                    |                            |                                 | 0  |

Table S2 The sequences of the qPCR primers used in this study.

| Gene                            | Forward primer        | Reverse primer          |
|---------------------------------|-----------------------|-------------------------|
| <i>PAFAH1B3</i>                 | ACATCCGGCCCAAGATTGTG  | GGGCTGTCGCTCATTACC      |
| <i>SERPINE1</i>                 | ACCGCAACGTGGTTTTCTCA  | TTGAATCCCATAGCTGCTTGAAT |
| <i>AP3B1</i>                    | GGCCTCTTTAGCAGCGATTTG | CATCCCAACAATCCGCTTCATA  |
| <i><math>\beta</math>-ACTIN</i> | CGTGGGCCGCCCTAGGCACCA | TTGGCTTAGGGTTCAGGGGGG   |

Table S3 102 tumor-sensitive drugs targeting mRNA molecules in this classifier.

| Gene            | Drug                   | cor      | P value  | Gene            | Drug          | cor      | P value  | Gene            | Drug         | cor      | P value  |
|-----------------|------------------------|----------|----------|-----------------|---------------|----------|----------|-----------------|--------------|----------|----------|
| <i>PAFAH1B3</i> | Cladribine             | 0.521753 | 2.26E-05 | <i>SERPINE1</i> | AS-703569     | 0.37018  | 0.003904 | <i>SERPINE1</i> | MPC-3100     | -0.34799 | 0.006919 |
| <i>SERPINE1</i> | BLU-667                | 0.518548 | 2.59E-05 | <i>SERPINE1</i> | DOLASTATIN 10 | -0.36972 | 0.003952 | <i>SERPINE1</i> | EMD-534085   | -0.34711 | 0.007072 |
| <i>SERPINE1</i> | Simvastatin            | 0.485434 | 9.74E-05 | <i>SERPINE1</i> | spebrutinib   | 0.368105 | 0.004125 | <i>SERPINE1</i> | Belinostat   | -0.34617 | 0.007238 |
| <i>SERPINE1</i> | Tamoxifen              | -0.48479 | 9.98E-05 | <i>AP3B1</i>    | ZM-336372     | 0.367926 | 0.004145 | <i>PAFAH1B3</i> | tfd          | 0.345015 | 0.007448 |
| <i>SERPINE1</i> | Staurosporine          | 0.4806   | 0.000117 | <i>SERPINE1</i> | Pazopanib     | 0.36524  | 0.004449 | <i>PAFAH1B3</i> | Asparaginase | 0.342274 | 0.007967 |
| <i>SERPINE1</i> | dimethylfasudil        | 0.475587 | 0.000141 | <i>SERPINE1</i> | Momelotinib   | 0.3642   | 0.004572 | <i>SERPINE1</i> | SNX-5422     | -0.341   | 0.008218 |
| <i>SERPINE1</i> | P-529                  | 0.461383 | 0.000235 | <i>SERPINE1</i> | Bleomycin     | 0.362245 | 0.004812 | <i>SERPINE1</i> | ARQ-680      | -0.3399  | 0.008441 |
| <i>SERPINE1</i> | JNJ-3887618            | 0.45954  | 0.000251 | <i>SERPINE1</i> | Rocilinostat  | -0.35707 | 0.005501 | <i>SERPINE1</i> | ulixertinib  | -0.33835 | 0.008764 |
| <i>SERPINE1</i> | Telatinib              | 0.458724 | 0.000258 | <i>PAFAH1B3</i> | Clofarabine   | 0.356497 | 0.005581 | <i>AP3B1</i>    | SAR-20347    | 0.337952 | 0.008849 |
| <i>SERPINE1</i> | XAV-939                | 0.457396 | 0.00027  | <i>SERPINE1</i> | BGB-283       | -0.3557  | 0.005696 | <i>PAFAH1B3</i> | Milciclib    | -0.33703 | 0.009048 |
| <i>SERPINE1</i> | By-Product of CUDC-305 | -0.45343 | 0.00031  | <i>SERPINE1</i> | R-306465      | -0.35524 | 0.005764 | <i>SERPINE1</i> | Bafetinib    | -0.33701 | 0.009052 |
| <i>SERPINE1</i> | AMG-900                | -0.44549 | 0.000407 | <i>PAFAH1B3</i> | Nelarabine    | 0.354665 | 0.005848 | <i>SERPINE1</i> | SB-202190    | -0.33593 | 0.009291 |
| <i>SERPINE1</i> | Tanespimycin           | -0.43964 | 0.000494 | <i>SERPINE1</i> | 4SC-202       | -0.35037 | 0.006519 | <i>SERPINE1</i> | VX-944       | -0.33447 | 0.009621 |
| <i>SERPINE1</i> | TAS-116                | -0.43712 | 0.000537 | <i>PAFAH1B3</i> | Gemcitabine   | 0.350338 | 0.006524 | <i>PAFAH1B3</i> | Sapacitabine | 0.381235 | 0.002891 |
| <i>SERPINE1</i> | Lenvatinib             | 0.432311 | 0.000628 | <i>SERPINE1</i> | SB-590885     | -0.34978 | 0.006616 | <i>SERPINE1</i> | Midostaurin  | 0.377187 | 0.003231 |
| <i>SERPINE1</i> | SGX-523                | 0.423714 | 0.000826 | <i>SERPINE1</i> | HYPOTHEMYCIN  | -0.34891 | 0.006761 | <i>SERPINE1</i> | B-7100       | -0.37512 | 0.003418 |
| <i>SERPINE1</i> | IDH1-Comp 301          | 0.422977 | 0.000845 | <i>SERPINE1</i> | Dasatinib     | 0.404415 | 0.001489 | <i>SERPINE1</i> | Alvespimycin | -0.37484 | 0.003444 |
| <i>SERPINE1</i> | Nilotinib              | -0.42014 | 0.000924 | <i>SERPINE1</i> | CUDC-305      | -0.40016 | 0.001688 | <i>SERPINE1</i> | Volasertib   | -0.37477 | 0.00345  |
| <i>SERPINE1</i> | JNJ-38877605           | 0.41876  | 0.000964 | <i>SERPINE1</i> | PKM2 (9)      | 0.390994 | 0.002199 | <i>SERPINE1</i> | AT-13387     | -0.4053  | 0.001451 |
| <i>SERPINE1</i> | IDH-C227               | 0.410715 | 0.001233 | <i>SERPINE1</i> | Vorinostat    | -0.39006 | 0.002259 | <i>PAFAH1B3</i> | CNDAC        | 0.389006 | 0.002327 |
